# Supplementary material for: Tea Tree Oil Mediates Antioxidant Factors Relish and Nrf2-Autophagy Axis Regulating the Lipid Metabolism of Macrobrachium rosenbergii
Source: MDPI journal article supplement (doi:10.3390/antiox11112260), 2022-11-16
Supplement: s1 [file s1]

**Table S1:** Primers used in the study.

| Gene           | Primer | Sequences (5'-3')      | Sequence source                  |
|----------------|--------|------------------------|----------------------------------|
| <i>β-actin</i> | F      | TCCGTAAGGACCTGTATGCC   | Tadese et al. 2021<br>AY651918.2 |
|                | R      | TCGGGAGGTGCGATGATTTT   |                                  |
| <i>6pgd</i>    | F      | GACTTCCGCACTAACCCACT   |                                  |
|                | R      | AGCTTCAGGACTGTTCCACC   |                                  |
| <i>Acca</i>    | F      | TCATTGGGAGCAACATCA     |                                  |
|                | R      | GCGATTAGGACAGCGAGT     |                                  |
| <i>Fasn</i>    | F      | TGGTGATCTTCCTCCAGCGT   |                                  |
|                | R      | ACGTAGGACACATCTGAGGGA  |                                  |
| <i>Dgat</i>    | F      | TCACAACCCGACAGACCG     |                                  |
|                | R      | TGGCGTTTGGAAATAGTAGC   |                                  |
| <i>G6pd</i>    | F      | GACGATCAAGCGACACGA     |                                  |
|                | R      | CAAGGTCACCCGAAGCAC     |                                  |
| <i>Atgl</i>    | F      | ATGGAGGGAGAAGTGAGT     |                                  |
|                | R      | ATAGACGGAGGTATGAGC     |                                  |
| <i>Cpt1</i>    | F      | TGATGGATGATGAAGCCTAT   |                                  |
|                | R      | TCCTCCCACCAATCTGTT     |                                  |
| <i>Hsl</i>     | F      | GCAGATATGCCGCTAACA     |                                  |
|                | R      | TCCCGAACAGATAAACAGG    |                                  |
| <i>Ampkα</i>   | F      | TGAAAGGGCGCTAAGTGGAG   |                                  |
|                | R      | ACTCGCACATGGAAAGGGTT   |                                  |
| <i>Srebp1</i>  | F      | AGGGCTATTGTGAGATGA     |                                  |
|                | R      | CTGTAGATGTTTATTGGGTT   |                                  |
| <i>Fatp1</i>   | F      | TTTATGACTGCTGGTGTAT    |                                  |
|                | R      | TGTAGAACAGCCAAAGAG     |                                  |
| <i>Fabp7</i>   | F      | TAGACTCGCTTGCTGACA     |                                  |
|                | R      | TACAATTACCCTGGATGG     |                                  |
| <i>Ppara</i>   | F      | ATGTCCAGTCCTCCTGTACTCC |                                  |
|                | R      | AAGAGCAGAGCCGCAATCAG   |                                  |
| <i>Pparγ</i>   | F      | TCTGTTACCGCTGGTGGCTG   |                                  |
|                | R      | TGTGAACCGTTTAGTGTTTGGC |                                  |
| <i>Keap1</i>   | F      | TTCCACGCCCTCCTCAA      | KF811013                         |
|                | R      | TGTACCCTCCCGCTATG      |                                  |
| <i>Nrf2</i>    | F      | CTGGACGAGGAGACTGGA     | KF733814                         |
|                | R      | ATCTGTGGTAGGTGGAAC     |                                  |
| <i>Imd</i>     | F      | CGACCACATTCTCCTCCTCCC  |                                  |
|                | R      | TTCAGTGCATCCACGTCCCTC  |                                  |
| <i>Relish</i>  | F      | GATGAGCCTTCAGTGCCAGA   | KR827675.1                       |
|                | R      | CCAGGTGACGCCATGTATCA   |                                  |

|                 |   |                          |
|-----------------|---|--------------------------|
| <i>Ampk</i>     | F | TTACTGCCACCGTCACATGG     |
|                 | R | TGGGGCAGCATAGTTTGGAG     |
| <i>Akt</i>      | F | GGTCCAAACATGCTCAACCAA    |
|                 | R | AGGTGTTCCCTACTTTCAC TTGC |
| <i>Mtor</i>     | F | GAGACTTCTGCCACGACGAA     |
|                 | R | CAAAACGGGCACCAACCAAT     |
| <i>Ulk1</i>     | F | CATAAGCCGACCATCTCCCC     |
|                 | R | CACATGGGAGGAGTGCCAAT     |
| <i>Beclin 1</i> | F | CAGCTTCATTCTGGGAGTGGT    |
|                 | R | ACGGAGAACGAAAGGTGTCC     |
| <i>Atg13</i>    | F | GTATAAAGTGCGTTCGCCCC     |
|                 | R | AATGACGTGGTCGTGGAAGT     |
| <i>Atg3</i>     | F | TTGGACAATTCCAGTCCCACA    |
|                 | R | CCCTACTTTCAC TTGCATCCTTG |
| <i>Atg4b</i>    | F | AGGCATCCGTTGAGCAAAAG     |
|                 | R | ACAAGGGATGGGGCTGTATG     |
| <i>Atg5</i>     | F | GCAAAGCTGTTCCACCACAA     |
|                 | R | TGATGGTTCCAAGGCTGTCG     |
| <i>Atg7</i>     | F | CGAGTAGGAAGCCCTTGTGG     |
|                 | R | TGTTGATGCAGGCTTTTGGC     |
| <i>Lc3</i>      | F | AGCGTATTACCTTCGACCA      |
|                 | R | AAGTCCTCTTCGTGGTGTTC     |
| <i>P62</i>      | F | ATCAACAGAGTCCGCGACAA     |
|                 | R | GGCACCAACCAATGTAGCAC     |

---
